# Supplementary material for: Age-Related Differences in Rejection Rates, Infections, and Tacrolimus Exposure in Pediatric Kidney Transplant Recipients in the CERTAIN Registry
Source: PubMed Central journal article supplement — Kidney Int Rep. 2024 Sep 2;9(11):3265–77. doi: 10.1016/j.ekir.2024.08.025 (PMC11551099; doi:10.1016/j.ekir.2024.08.025), 2024-09-02
Supplement: mmc1.pdf [file mmc1.pdf]

## Supplementary Tables

**Table S1:** Number of included patients per center

| <b>Study Center</b>   | <b>Number of included patients</b> |
|-----------------------|------------------------------------|
| <b>Czech Republic</b> |                                    |
| Prague                | 22                                 |
| <b>France</b>         |                                    |
| Lyon                  | 12                                 |
| Toulouse              | 4                                  |
| <b>Germany</b>        |                                    |
| Heidelberg            | 102                                |
| Essen                 | 36                                 |
| Hamburg               | 25                                 |
| Tuebingen             | 24                                 |
| Stuttgart             | 18                                 |
| Muenster              | 16                                 |
| Berlin                | 13                                 |
| Hannover              | 10                                 |
| Marburg               | 9                                  |
| Freiburg              | 6                                  |
| Cologne               | 5                                  |
| Leipzig               | 4                                  |
| Memmingen             | 2                                  |
| Ulm                   | 2                                  |
| Frankfurt             | 1                                  |
| Rostock               | 1                                  |
| <b>Greece</b>         |                                    |
| Thessaloniki          | 4                                  |
| <b>Hungary</b>        |                                    |
| Budapest              | 21                                 |
| <b>Ireland</b>        |                                    |
| Dublin                | 46                                 |
| <b>Italy</b>          |                                    |
| Rome                  | 118                                |
| Padua                 | 33                                 |
| Milan                 | 23                                 |
| Turin                 | 13                                 |
| <b>Netherlands</b>    |                                    |
| Amsterdam             | 1                                  |
| <b>Poland</b>         |                                    |
| Warsaw                | 64                                 |
| <b>Russia</b>         |                                    |
| Moscow                | 19                                 |

**Spain**

Barcelona 3

**Switzerland**

Zurich 16

**Turkey**

Ankara 38

Samsun 9

Istanbul 6

Gazi 2

Izmir 2

**United Kingdom**

Manchester 56

Birmingham 13

Nottingham 2

London 1

---

**Table S2:** Infection subtypes in the first 2 years post-transplant

| <b>Infection subtype</b>    | <b>&lt; 6 years<br/>(N=206)</b> | <b>6-12 years<br/>(N=278)</b> | <b>&gt; 12 years<br/>(N=318)</b> |
|-----------------------------|---------------------------------|-------------------------------|----------------------------------|
| Gastroenteritis             | 83 (40.3%)                      | 68 (24.5%)                    | 48 (15.1%)                       |
| Gastritis                   | 5 (2.43%)                       | 9 (3.24%)                     | 8 (2.52%)                        |
| Colitis                     | 3 (1.46%)                       | 8 (2.88%)                     | 5 (1.57%)                        |
| Peritonitis                 | 1 (0.49%)                       | 1 (0.36%)                     | 0 (0.00%)                        |
| Lower respiratory infection | 52 (25.2%)                      | 37 (13.3%)                    | 26 (8.18%)                       |
| Pyelonephritis              | 50 (24.3%)                      | 40 (14.4%)                    | 35 (11.0%)                       |
| Cystitis                    | 38 (18.5%)                      | 51 (18.4%)                    | 46 (14.5%)                       |
| BKPyV                       | 43 (20.9%)                      | 37 (13.3%)                    | 30 (9.4%)                        |
| CMV                         | 36 (17.5%)                      | 39 (14.0%)                    | 49 (15.4%)                       |
| EBV                         | 65 (31.6%)                      | 48 (17.3%)                    | 32 (10.1%)                       |
| Sepsis                      | 26 (12.6%)                      | 19 (6.8%)                     | 16 (5.03%)                       |
| Hepatitis                   | 2 (0.97%)                       | 3 (1.08%)                     | 2 (0.62%)                        |
| HIV                         | 0 (0.00%)                       | 1 (0.36%)                     | 0 (0.00%)                        |
| Pneumocystis jirovecii      | 2 (0.97%)                       | 0 (0.00%)                     | 1 (0.31%)                        |
| Other fungal infection      | 9 (4.37%)                       | 7 (2.52%)                     | 9 (2.83%)                        |
| Other viral infection       | 76 (36.9%)                      | 62 (22.3%)                    | 53 (16.7%)                       |

BKPyV, BK polyomavirus; CMV, Cytomegalovirus; EBV, Epstein-Barr virus; HIV, Human immunodeficiency virus

**Table S3: Outcome parameters in the first two years post-transplant for patients < 2 years (N=18)**

---

|                                            |             |
|--------------------------------------------|-------------|
| Rejection episodes, N                      |             |
| Year 1                                     | 0           |
| Year 2                                     | 1           |
| Infections, N                              |             |
| Year 1                                     | 15          |
| Year 2                                     | 10          |
| Graft dysfunction, N                       | 2           |
| Diabetes mellitus, N                       | 0           |
| Death, N                                   | 0           |
| Cumulative hospitalization days, mean (SD) | 41.6 (40.5) |
| GFR, mean (SD)                             |             |
| Month 3                                    | 77.8 (33.3) |
| Month 12                                   | 68.7 (24.4) |
| Month 24                                   | 73.5 (25.5) |

---

GFR, estimated glomerular filtration rate.

**Table S4: Tacrolimus exposure parameters in patients <2 years (N=18). Data are mean (SD).**

---

|                                             |              |
|---------------------------------------------|--------------|
| Tacrolimus trough level (ng/mL)             |              |
| Month 1-3                                   | 8.2 (2.52)   |
| Month 6-12                                  | 6.12 (1.74 ) |
| Month 18-24                                 | 5.08 (2.11)  |
| TacIPV – CV (%)                             | 24.0 (16.5)  |
| TacIPV -MAD (%)                             | 17.4 (12.6)  |
| BSA-corrected C/D ratio                     |              |
| Month 1-12                                  | 1.21 (0.60)  |
| Month 1-3                                   | 1.16 (0.73)  |
| Month 6-12                                  | 1.42 (0.73)  |
| BW-corrected C/D ratio                      |              |
| Month 1-12                                  | 26.0 (12.7)  |
| Month 1-3                                   | 25.1 (15.4)  |
| Month 6-12                                  | 32.4 (21.2)  |
| BSA-1.73m <sup>2</sup> -corrected C/D ratio |              |
| Month 1-12                                  | 0.81 (0.36)  |
| Month 1-3                                   | 0.67 (0.42)  |
| Month 6-12                                  | 0.89 (0.45)  |

---

TacIPV, tacrolimus inpatient variability; CV, coefficient of variation; MAD, mean absolute deviation; C/D ratio, concentration/dose ratio; BSA, body surface area; BW, body weight; BSA-1.73m<sup>2</sup>, BSA scaled for 1.73 m<sup>2</sup>

STROBE Statement—checklist of items that should be included in reports of observational studies

| Item No.            | Recommendation                                                                                                                                                                                                                                                                                                                                                                                                                                                                                                                                                                                                                                                                                       | Page No. | Relevant text from manuscript |
|---------------------|------------------------------------------------------------------------------------------------------------------------------------------------------------------------------------------------------------------------------------------------------------------------------------------------------------------------------------------------------------------------------------------------------------------------------------------------------------------------------------------------------------------------------------------------------------------------------------------------------------------------------------------------------------------------------------------------------|----------|-------------------------------|
| 1                   | (a) Indicate the study's design with a commonly used term in the title or the abstract                                                                                                                                                                                                                                                                                                                                                                                                                                                                                                                                                                                                               | 1        | Line 1-2                      |
|                     | (b) Provide in the abstract an informative and balanced summary of what was done and what was found                                                                                                                                                                                                                                                                                                                                                                                                                                                                                                                                                                                                  | 3        | Line 49-53                    |
| <b>Introduction</b> |                                                                                                                                                                                                                                                                                                                                                                                                                                                                                                                                                                                                                                                                                                      |          |                               |
| 2                   | Explain the scientific background and rationale for the investigation being reported                                                                                                                                                                                                                                                                                                                                                                                                                                                                                                                                                                                                                 | 4        | Line 69-85                    |
| 3                   | State specific objectives, including any prespecified hypotheses                                                                                                                                                                                                                                                                                                                                                                                                                                                                                                                                                                                                                                     | 4        | Line 86-93                    |
| <b>Methods</b>      |                                                                                                                                                                                                                                                                                                                                                                                                                                                                                                                                                                                                                                                                                                      |          |                               |
| 4                   | Present key elements of study design early in the paper                                                                                                                                                                                                                                                                                                                                                                                                                                                                                                                                                                                                                                              | 5        | Line 96-97                    |
| 5                   | Describe the setting, locations, and relevant dates, including periods of recruitment, exposure, follow-up, and data collection                                                                                                                                                                                                                                                                                                                                                                                                                                                                                                                                                                      | 5        | Line 96-109                   |
| 6                   | (a) <i>Cohort study</i> —Give the eligibility criteria, and the sources and methods of selection of participants. Describe methods of follow-up<br><i>Case-control study</i> —Give the eligibility criteria, and the sources and methods of case ascertainment and control selection. Give the rationale for the choice of cases and controls<br><i>Cross-sectional study</i> —Give the eligibility criteria, and the sources and methods of selection of participants<br><br>(b) <i>Cohort study</i> —For matched studies, give matching criteria and number of exposed and unexposed<br><i>Case-control study</i> —For matched studies, give matching criteria and the number of controls per case | NA       | Line 110-115                  |
| 7                   | Clearly define all outcomes, exposures, predictors, potential confounders, and effect modifiers. Give diagnostic criteria, if applicable                                                                                                                                                                                                                                                                                                                                                                                                                                                                                                                                                             | 5        | Line 116-153                  |
| 8*                  | For each variable of interest, give sources of data and details of methods of assessment (measurement). Describe comparability of assessment methods if there is more than one group                                                                                                                                                                                                                                                                                                                                                                                                                                                                                                                 | 5        | Line 116-153                  |
| 9                   | Describe any efforts to address potential sources of bias                                                                                                                                                                                                                                                                                                                                                                                                                                                                                                                                                                                                                                            | 7        | Line 154-171                  |
| 10                  | Explain how the study size was arrived at                                                                                                                                                                                                                                                                                                                                                                                                                                                                                                                                                                                                                                                            | 5        | Line 110-115, Figure 1        |

Continued on next page

|                        |     |                                                                                                                                                                                                              |    |                       |
|------------------------|-----|--------------------------------------------------------------------------------------------------------------------------------------------------------------------------------------------------------------|----|-----------------------|
| Quantitative variables | 11  | Explain how quantitative variables were handled in the analyses. If applicable, describe which groupings were chosen and why                                                                                 | 7  | Line 154-171          |
| Statistical methods    | 12  | (a) Describe all statistical methods, including those used to control for confounding                                                                                                                        | 7  | Line 154-171          |
|                        |     | (b) Describe any methods used to examine subgroups and interactions                                                                                                                                          | 7  | Line 154-171          |
|                        |     | (c) Explain how missing data were addressed                                                                                                                                                                  | 7  | Line 169-171          |
|                        |     | (d) <i>Cohort study</i> —If applicable, explain how loss to follow-up was addressed                                                                                                                          | NA |                       |
|                        |     | <i>Case-control study</i> —If applicable, explain how matching of cases and controls was addressed                                                                                                           |    |                       |
|                        |     | <i>Cross-sectional study</i> —If applicable, describe analytical methods taking account of sampling strategy                                                                                                 |    |                       |
|                        |     | (e) Describe any sensitivity analyses                                                                                                                                                                        | NA |                       |
|                        |     |                                                                                                                                                                                                              |    |                       |
| <b>Results</b>         |     |                                                                                                                                                                                                              |    |                       |
| Participants           | 13* | (a) Report numbers of individuals at each stage of study—eg numbers potentially eligible, examined for eligibility, confirmed eligible, included in the study, completing follow-up, and analysed            | 17 | Figure 1              |
|                        |     | (b) Give reasons for non-participation at each stage                                                                                                                                                         | 17 | Figure 1              |
|                        |     | (c) Consider use of a flow diagram                                                                                                                                                                           | 17 | Figure 1              |
| Descriptive data       | 14* | (a) Give characteristics of study participants (eg demographic, clinical, social) and information on exposures and potential confounders                                                                     | 8  | Line 173-188, Table 1 |
|                        |     | (b) Indicate number of participants with missing data for each variable of interest                                                                                                                          | 7  | Line 169-171          |
|                        |     | (c) <i>Cohort study</i> —Summarise follow-up time (eg, average and total amount)                                                                                                                             | 24 | Table 1               |
| Outcome data           | 15* | <i>Cohort study</i> —Report numbers of outcome events or summary measures over time                                                                                                                          | NA |                       |
|                        |     | <i>Case-control study</i> —Report numbers in each exposure category, or summary measures of exposure                                                                                                         |    |                       |
|                        |     | <i>Cross-sectional study</i> —Report numbers of outcome events or summary measures                                                                                                                           |    |                       |
| Main results           | 16  | (a) Give unadjusted estimates and, if applicable, confounder-adjusted estimates and their precision (eg, 95% confidence interval). Make clear which confounders were adjusted for and why they were included | 3  | Table 2               |
|                        |     | (b) Report category boundaries when continuous variables were categorized                                                                                                                                    | 8  | Line 184-185          |
|                        |     | (c) If relevant, consider translating estimates of relative risk into absolute risk for a meaningful time period                                                                                             | NA |                       |

Continued on next page

|                          |    |                                                                                                                                                                            |    |              |
|--------------------------|----|----------------------------------------------------------------------------------------------------------------------------------------------------------------------------|----|--------------|
| Other analyses           | 17 | Report other analyses done—eg analyses of subgroups and interactions, and sensitivity analyses                                                                             | NA |              |
| <b>Discussion</b>        |    |                                                                                                                                                                            |    |              |
| Key results              | 18 | Summarise key results with reference to study objectives                                                                                                                   | 11 | Line 269-272 |
| Limitations              | 19 | Discuss limitations of the study, taking into account sources of potential bias or imprecision. Discuss both direction and magnitude of any potential bias                 | 13 | Line 315-320 |
| Interpretation           | 20 | Give a cautious overall interpretation of results considering objectives, limitations, multiplicity of analyses, results from similar studies, and other relevant evidence | 13 | Line 321-327 |
| Generalisability         | 21 | Discuss the generalisability (external validity) of the study results                                                                                                      | 13 | Line 325-327 |
| <b>Other information</b> |    |                                                                                                                                                                            |    |              |
| Funding                  | 22 | Give the source of funding and the role of the funders for the present study and, if applicable, for the original study on which the present article is based              | 14 | Line 328-326 |

\*Give information separately for cases and controls in case-control studies and, if applicable, for exposed and unexposed groups in cohort and cross-sectional studies.

**Note:** An Explanation and Elaboration article discusses each checklist item and gives methodological background and published examples of transparent reporting. The STROBE checklist is best used in conjunction with this article (freely available on the Web sites of PLoS Medicine at <http://www.plosmedicine.org/>, Annals of Internal Medicine at <http://www.annals.org/>, and Epidemiology at <http://www.epidem.com/>). Information on the STROBE Initiative is available at [www.strobe-statement.org](http://www.strobe-statement.org).
